# Supplementary material for: Proanthocyanidins Limit Adipose Accrual Induced by a Cafeteria Diet, Several Weeks after the End of the Treatment
Source: PubMed Central journal article supplement (PMC6723337; doi:10.3390/genes10080598), 2019-08-08
Supplement: genes-10-00598-s001.pdf [file genes-10-00598-s001.pdf]

Standard diet 

Cafeteria diet 

High-fat/High-sucrose diet 

GSPE oral gavage (500 mg/Kg bw) 

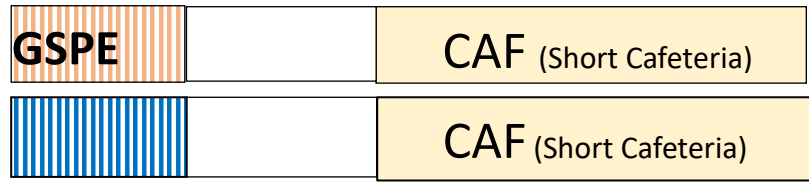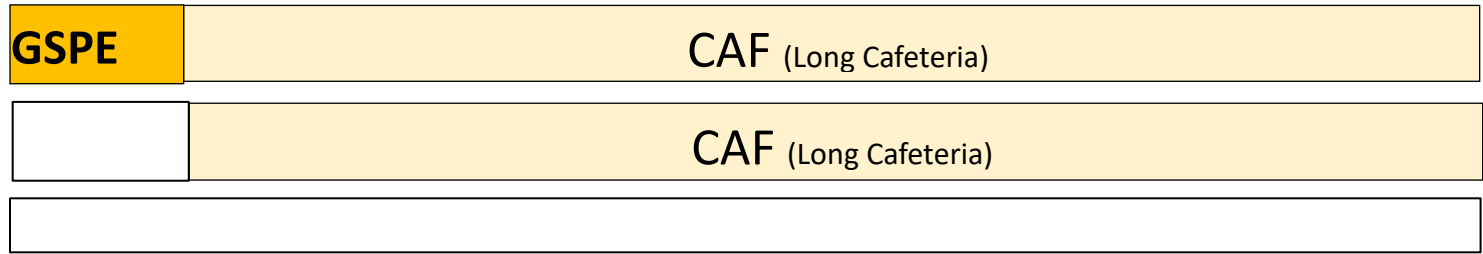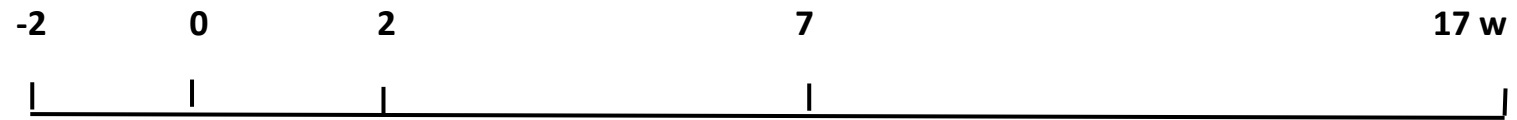

SC:  
Plasma  
Tissues

LC:  
Plasma  
Tissues

**Supplementary Figure 1. Schematic diagram of the experimental design.** (1) CAF-Short Cafeteria: rats receiving a GSPE preventive treatment for 10 days together with a high fat/high sucrose diet followed by an 18-day chow diet (standard diet) and then the 35-day cafeteria diet; (2) CAF-Long Cafeteria: rats receiving a GSPE preventive treatment 10 days before the 17-week cafeteria intervention. GSPE: grape seed proanthocyanidin extract; SC: Short Cafeteria; LC: Long Cafeteria.
